# Supplementary material for: Increasing retractions of meta-analyses publications for methodological flaw
Source: Springer Nature journal article supplement (doi:10.1186/s13643-021-01822-2), 2021-10-08
Supplement: MOESM1 [file 19741354]

## Additional file 1 | Database and search strategy

### Primary search strategy

- #1. retract\*
- #2. meta-analysis
- #3. meta-regression
- #4. metaanalysis
- #5. metaregression
- #6. network meta-analysis
- #7. dose-response meta-analysis
- #8. #2 OR #3 OR #4 OR #5 OR #6 OR #7
- #9. #1 AND #8

### Embase (i = 210)

retract\*:ti AND ('meta analysis'/exp OR 'analysis, meta' OR 'meta analysis' OR 'meta-analysis' OR 'metaanalysis' OR 'meta regression'/exp OR metaregression OR 'network meta-analysis'/exp OR 'network meta-analyses' OR 'network meta-analysis' OR 'network metaanalyses' OR 'network metaanalysis' OR 'dose-response meta-analysis')

### PubMed (i = 205)

retract\*[ti] AND (meta-analysis OR meta-regression OR metaanalysis OR metaregression OR network meta-analysis OR dose-response meta-analysis)

### Search details in PubMed:

"retract\*" [Title] AND ("meta analysis" [Publication Type] OR "meta analysis as topic" [MeSH Terms] OR "meta analysis" [All Fields] OR "meta-regression" [All Fields] OR ("meta analysis as topic" [MeSH Terms] OR ("meta analysis" [All Fields] AND "topic" [All Fields]) OR "meta analysis as topic" [All Fields] OR "metaanalysis" [All Fields]) OR ("metaregression" [All Fields] OR "metaregressions" [All Fields]) OR ("network meta analysis" [MeSH Terms] OR ("network" [All Fields] AND "meta analysis" [All Fields]) OR "network meta analysis" [All Fields] OR ("network" [All Fields] AND "meta" [All Fields] AND "analysis" [All Fields]) OR "network meta analysis" [All Fields]) OR (("dose response" [Journal] OR ("dose" [All Fields] AND "response" [All Fields]) OR "dose response" [All Fields]) AND ("meta analysis" [Publication Type] OR "meta analysis as topic" [MeSH Terms] OR "meta analysis" [All Fields]))))

### Web of Science (i = 356)

TITLE: (retract\*) AND TOPIC: (meta-analysis OR meta-regression OR metaanalysis OR metaregression OR network meta-analysis OR dose-response meta-analysis)

Timespan: All years. Indexes: SCI-EXPANDED, SSCI, A&HCI, ESCI.
