# Supplementary material for: Increasing retractions of meta-analyses publications for methodological flaw
Source: Springer Nature journal article supplement (doi:10.1186/s13643-021-01822-2), 2021-10-08

**Additional file 2 | Flow diagram of study selection**

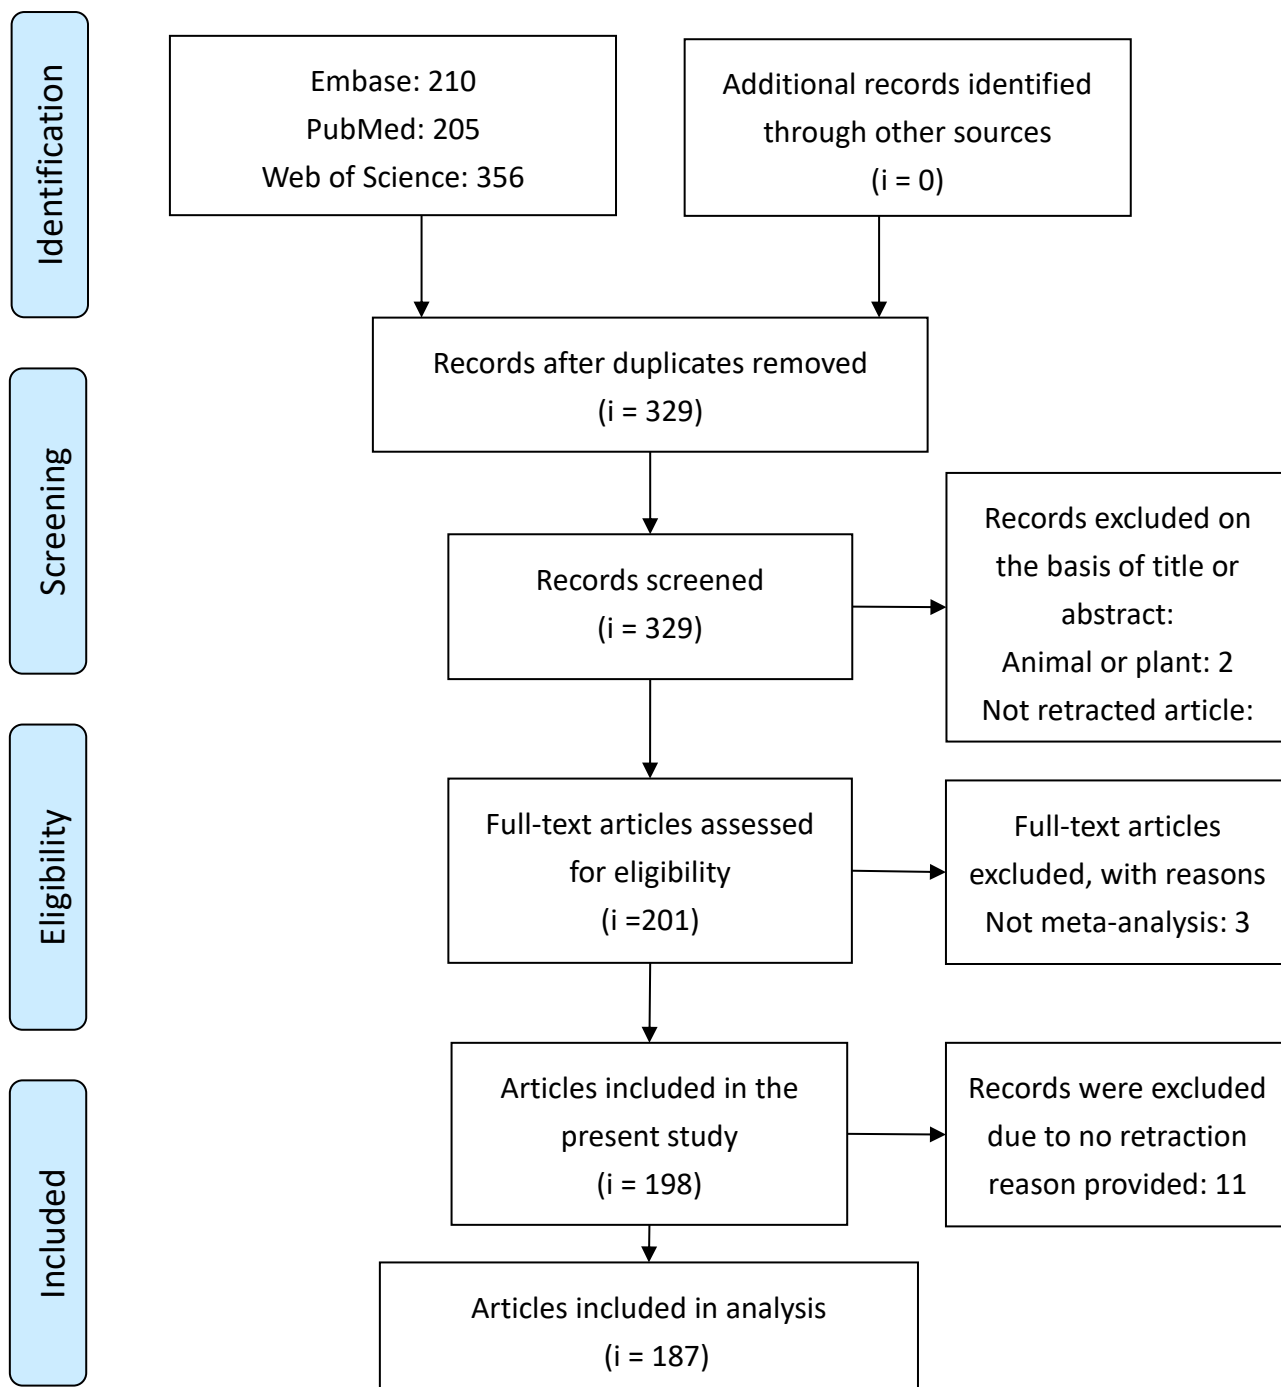

Supplement: MOESM2 [file 19741354]
