# Supplementary material for: Increasing retractions of meta-analyses publications for methodological flaw
Source: Springer Nature journal article supplement (doi:10.1186/s13643-021-01822-2), 2021-10-08
Supplement: MOESM4 [file 19741354]

**Additional file 4 | Reference characteristics of retracted meta-analyses before June 2021 (i=198)**

| <i>No</i> | <i>First Author</i> | <i>Journal</i>                                                       | <i>Retraction year</i> | <i>Method</i> | <i>Writing</i> | <i>Ethic</i> |
|-----------|---------------------|----------------------------------------------------------------------|------------------------|---------------|----------------|--------------|
| S1        | Armstrong           | <i>Gerontologist</i>                                                 | 2020                   | ✓             |                |              |
| S2        | Asrani              | <i>Medicine</i>                                                      | 2017                   | ✓             | ✓              |              |
| S3        | Boccardi            | <i>J Hum Hypertens</i>                                               | 2019                   | ✓             |                |              |
| S4        | Cao                 | <i>Molecular Neurobiology</i>                                        | 2015                   |               |                | ✓            |
| S5        | Chan                | <i>Journal of Affective Disorders</i>                                | 2018                   | ✓             |                |              |
| S6        | Chang               | <i>Tumor Biology</i>                                                 | 2015                   |               |                | ✓            |
| S7        | Chen                | <i>DNA and Cell Biology</i>                                          | 2015                   |               |                | ✓            |
| S8        | Chen                | <i>Molecular Biology Reports</i>                                     | 2015                   |               |                | ✓            |
| S9        | Chen                | <i>Molecular Neurobiology</i>                                        | 2015                   |               |                | ✓            |
| S10       | Chen                | <i>Skeletal Radiology</i>                                            | 2015                   |               |                | ✓            |
| S11       | Chen                | <i>DNA and Cell Biology</i>                                          | 2015                   |               |                | ✓            |
| S12       | Cheng               | <i>Medicine</i>                                                      | 2018                   |               |                | ✓            |
| S13       | Cremonini ¥         | <i>Aliment Pharmacol Ther</i>                                        | 2003                   | N/A           | N/A            | N/A          |
| S14       | da Costa            | <i>Lancet</i>                                                        | 2016                   |               |                | ✓            |
| S15       | De Vecchis          | <i>High Blood Press Cardiovasc Prev</i>                              | 2020                   |               |                | ✓            |
| S16       | Deng                | <i>Pediatric Surgery International</i>                               | 2019                   |               |                | ✓            |
| S17       | Di Lorenzo          | <i>Circulation</i>                                                   | 2010                   |               |                | ✓            |
| S18       | DiNicolantonio      | <i>Heart</i>                                                         | 2013                   | ✓             |                |              |
| S19       | Dong                | <i>Molecular Biology Reports</i>                                     | 2015                   |               |                | ✓            |
| S20       | Dong                | <i>Molecular Neurobiology</i>                                        | 2015                   |               |                | ✓            |
| S21       | Ezenwa              | <i>Journal of Human Lactation</i>                                    | 2020                   | ✓             |                |              |
| S22       | Fialho              | <i>Aids Care-Psychological and Socio-Medical Aspects of Aids/Hiv</i> | 2016                   |               | ✓              |              |
| S23       | Fischer             | <i>Journal of Cross-Cultural Psychology</i>                          | 2019                   | ✓             |                |              |
| S24       | Gao                 | <i>International Journal of Geriatric Psychiatry</i>                 | 2015                   | ✓             | ✓              |              |
| S25       | Gao                 | <i>Molecular Biology Reports</i>                                     | 2015                   |               |                | ✓            |
| S26       | Gao                 | <i>Tumor Biology</i>                                                 | 2015                   |               |                | ✓            |
| S27       | Ghaderi             | <i>European Journal of Clinical Pharmacology</i>                     | 2019                   |               | ✓              |              |
| S28       | Gotink              | <i>PLoS ONE</i>                                                      | 2019                   | ✓             |                | ✓            |
| S29       | Grilli              | <i>Current Opinion in Microbiology</i>                               | 2017                   |               | ✓              |              |
| S30       | Gu                  | <i>Archives of Physical Medicine and Rehabilitation</i>              | 2017                   |               |                | ✓            |
| S31       | Gu                  | <i>British Journal of Psychiatry</i>                                 | 2020                   | ✓             |                |              |

| <b>No</b> | <b>First Author</b> | <b>Journal</b>                                                     | <b>Retraction year</b> | <b>Method</b> | <b>Writing</b> | <b>Ethic</b> |
|-----------|---------------------|--------------------------------------------------------------------|------------------------|---------------|----------------|--------------|
| S32       | Gu                  | <i>Tumor Biology</i>                                               | 2015                   |               |                | ✓            |
| S33       | Gumley              | <i>British Journal of Clinical Psychology</i>                      | 2017                   | ✓             |                |              |
| S34       | Guo                 | <i>Crop Science</i>                                                | 2006                   | ✓             | ✓              |              |
| S35       | Guo ¥               | <i>Eur J Prev Cardiol</i>                                          | 2020                   | N/A           | N/A            | N/A          |
| S36       | Han                 | <i>Tumor Biology</i>                                               | 2017                   |               |                | ✓            |
| S37       | Hao                 | <i>Molecular Neurobiology</i>                                      | 2015                   |               |                | ✓            |
| S38       | He                  | <i>Tumor Biology</i>                                               | 2017                   |               |                | ✓            |
| S39       | Henson              | <i>Journal of Clinical Oncology</i>                                | 2016                   | ✓             |                |              |
| S40       | Hoang               | <i>Cancer Research and Treatment</i>                               | 2020                   |               |                | ✓            |
| S41       | Hofmann             | <i>Psychiatry Res</i>                                              | 2018                   | ✓             |                |              |
| S42       | Hu                  | <i>Educational Psychology Review</i>                               | 2020                   | ✓             | ✓              |              |
| S43       | Huang               | <i>European Journal of Medical Research</i>                        | 2015                   |               |                | ✓            |
| S44       | Huang               | <i>PLoS One</i>                                                    | 2014                   | ✓             | ✓              |              |
| S45       | Iwamoto ‡           | <i>Clinical Drug Investigation</i>                                 | 2018                   | N/A           | N/A            | N/A          |
| S46       | Iwamoto ‡           | <i>Current Medical Research and Opinion</i>                        | 2017                   | N/A           | N/A            | N/A          |
| S47       | Iwamoto ‡           | <i>Current Medical Research and Opinion</i>                        | 2017                   | N/A           | N/A            | N/A          |
| S48       | Ji                  | <i>International Journal of Ophthalmology</i>                      | 2017                   |               |                | ✓            |
| S49       | Ji                  | <i>Spinal Cord</i>                                                 | 2015                   |               |                | ✓            |
| S50       | Jian                | <i>Medicine</i>                                                    | 2019                   | ✓             |                |              |
| S51       | Jiang               | <i>European Journal of Medical Research</i>                        | 2015                   |               |                | ✓            |
| S52       | Jin                 | <i>Tumor Biology</i>                                               | 2017                   |               |                | ✓            |
| S53       | Kamp                | <i>Journal of Affective Disorders</i>                              | 2019                   |               |                | ✓            |
| S54       | Li                  | <i>J Cardiothorac Surg</i>                                         | 2015                   |               |                | ✓            |
| S55       | Li ¥                | <i>J Integr Med</i>                                                | 2013                   |               |                |              |
| S56       | Li                  | <i>Journal of orthopaedic surgery and research</i>                 | 2018                   |               |                | ✓            |
| S57       | Li                  | <i>Molecular Biology Reports</i>                                   | 2015                   |               |                | ✓            |
| S58       | Li                  | <i>Molecular Biology Reports</i>                                   | 2015                   |               |                | ✓            |
| S59       | Li                  | <i>Molecular Neurobiology</i>                                      | 2017                   |               |                | ✓            |
| S60       | Li                  | <i>PLoS One</i>                                                    | 2018                   | ✓             | ✓              |              |
| S61       | Li                  | <i>Tumor Biology</i>                                               | 2017                   |               |                | ✓            |
| S62       | Li                  | <i>Tumor Biology</i>                                               | 2017                   |               |                | ✓            |
| S63       | Li                  | <i>Tumor Biology</i>                                               | 2015                   |               |                | ✓            |
| S64       | Li                  | <i>Tumor Biology</i>                                               | 2015                   |               |                | ✓            |
| S65       | Liang               | <i>International Journal of Clinical and Experimental Medicine</i> | 2016                   |               |                | ✓            |

| <b>No</b> | <b>First Author</b> | <b>Journal</b>                                                                  | <b>Retraction year</b> | <b>Method</b> | <b>Writing</b> | <b>Ethic</b> |
|-----------|---------------------|---------------------------------------------------------------------------------|------------------------|---------------|----------------|--------------|
| S66       | Lin                 | <i>BioMed Research International</i>                                            | 2019                   | ✓             | ✓              | ✓            |
| S67       | Lin                 | <i>Journal of Cancer Research and Therapeutics</i>                              | 2017                   |               |                | ✓            |
| S68       | Liu                 | <i>Acta Radiologica</i>                                                         | 2019                   |               |                | ✓            |
| S69       | Liu                 | <i>BioMed Research International</i>                                            | 2019                   |               |                | ✓            |
| S70       | Liu                 | <i>International Urology and Nephrology</i>                                     | 2016                   |               |                | ✓            |
| S71       | Liu                 | <i>Rheumatology</i>                                                             | 2011                   | ✓             |                |              |
| S72       | Liu                 | <i>Targeted Oncology</i>                                                        | 2016                   |               |                | ✓            |
| S73       | López-Valverde      | <i>Journal of Clinical Medicine</i>                                             | 2020                   | ✓             | ✓              |              |
| S74       | Luo                 | <i>Tumor Biology</i>                                                            | 2017                   |               |                | ✓            |
| S75       | Lv                  | <i>British Journal of Clinical Pharmacology</i>                                 | 2016                   |               |                | ✓            |
| S76       | Lv                  | <i>Molecular Neurobiology</i>                                                   | 2017                   |               |                | ✓            |
| S77       | Lv                  | <i>Tumor Biology</i>                                                            | 2017                   |               |                | ✓            |
| S78       | Ma                  | <i>Tumor Biology</i>                                                            | 2017                   |               |                | ✓            |
| S79       | Mahboobi            | <i>Journal of Human Hypertension</i>                                            | 2019                   | ✓             |                |              |
| S80       | Mahmoudi            | <i>Human Vaccines and Immunotherapeutics</i>                                    | 2017                   | ✓             |                |              |
| S81       | Maria               | <i>Resuscitation</i>                                                            | 2019                   |               | ✓              |              |
| S82       | Maslej              | <i>JAMA Psychiatry</i>                                                          | 2020                   | ✓             |                |              |
| S83       | May                 | <i>International Journal of Drug Policy</i>                                     | 2018                   | ✓             |                |              |
| S84       | Mohsenzadeh         | <i>European Journal of Obstetrics &amp; Gynecology and Reproductive Biology</i> | 2019                   |               |                | ✓            |
| S85       | Panagioti           | <i>JAMA Intern Med</i>                                                          | 2020                   | ✓             |                |              |
| S86       | Parsaik             | <i>Journal of Psychiatric Practice</i>                                          | 2018                   | ✓             | ✓              |              |
| S87       | Parvez ¥            | <i>Journal of the College of Physicians and Surgeons Pakistan</i>               | 2009                   | N/A           | N/A            | N/A          |
| S88       | Poolsup             | <i>PLoS One</i>                                                                 | 2020                   | ✓             | ✓              |              |
| S89       | Qian                | <i>European Journal of Medical Research</i>                                     | 2015                   |               |                | ✓            |
| S90       | Ramsay              | <i>BMC Medicine</i>                                                             | 2018                   | ✓             |                |              |
| S91       | Raslau              | <i>Aerospace Medicine and Human Performance</i>                                 | 2015                   | ✓             |                |              |
| S92       | Ren                 | <i>Medicine</i>                                                                 | 2017                   | ✓             |                |              |
| S93       | Roba                | <i>Maternal Health, Neonatology and Perinatology</i>                            | 2020                   | ✓             |                |              |
| S94       | Shao                | <i>Annals of Translational Medicine</i>                                         | 2016                   |               |                | ✓            |

| <b>No</b> | <b>First Author</b> | <b>Journal</b>                                                                  | <b>Retraction year</b> | <b>Method</b> | <b>Writing</b> | <b>Ethic</b> |
|-----------|---------------------|---------------------------------------------------------------------------------|------------------------|---------------|----------------|--------------|
| S95       | Shen                | <i>Journal of Cellular and Molecular Medicine</i>                               | 2018                   |               |                | ✓            |
| S96       | Siddique            | <i>Sports Medicine</i>                                                          | 2019                   | ✓             |                |              |
| S97       | Siempos             | <i>The Lancet Respiratory medicine</i>                                          | 2015                   | ✓             |                |              |
| S98       | Soria-Gila          | <i>Journal of Strength and Conditioning Research</i>                            | 2018                   |               | ✓              |              |
| S99       | Stevens             | <i>Pharm Stat</i>                                                               | 2007                   |               | ✓              |              |
| S100      | Sun                 | <i>Bioscience Trends</i>                                                        | 2016                   | ✓             |                |              |
| S101      | Sun                 | <i>Molecular Neurobiology</i>                                                   | 2015                   |               |                | ✓            |
| S102      | Sun                 | <i>The Scientific World Journal</i>                                             | 2020                   |               | ✓              | ✓            |
| S103      | Sun                 | <i>Tumor Biology</i>                                                            | 2017                   |               |                | ✓            |
| S104      | Tan                 | <i>Alzheimers Research &amp; Therapy</i>                                        | 2016                   | ✓             |                |              |
| S105      | Thatcher            | <i>J Appl Psychol</i>                                                           | 2016                   | ✓             |                |              |
| S106      | Tian                | <i>Medicine</i>                                                                 | 2019                   | ✓             |                |              |
| S107      | Vecchis             | <i>Interv Med Appl Sci</i>                                                      | 2017                   |               |                | ✓            |
| S108      | Viani               | <i>International Journal of Radiation Oncology Biology Physics</i>              | 2013                   | ✓             |                |              |
| S109      | Vlok                | <i>Am J Emerg Med</i>                                                           | 2020                   |               |                | ✓            |
| S110      | Wang                | <i>Annals of Human Genetics</i>                                                 | 2016                   |               |                | ✓            |
| S111      | Wang                | <i>Bmc Musculoskeletal Disorders</i>                                            | 2015                   |               |                | ✓            |
| S112      | Wang                | <i>Future Generation Computer Systems-the International Journal of Escience</i> | 2020                   |               |                | ✓            |
| S113      | Wang                | <i>Gen Psychiatr</i>                                                            | 2019                   | ✓             |                |              |
| S114      | Wang                | <i>International Journal of Clinical and Experimental Medicine</i>              | 2016                   |               |                | ✓            |
| S115      | Wang                | <i>International Journal of Ophthalmology</i>                                   | 2019                   | ✓             |                |              |
| S116      | Wang                | <i>Medicine</i>                                                                 | 2018                   | ✓             |                |              |
| S117      | Wang                | <i>Molecular Biology Reports</i>                                                | 2015                   |               |                | ✓            |
| S118      | Wang                | <i>Molecular Biology Reports</i>                                                | 2015                   |               |                | ✓            |
| S119      | Wang                | <i>Nutrition Journal</i>                                                        | 2018                   | ✓             |                | ✓            |
| S120      | Wang                | <i>PLoS One</i>                                                                 | 2016                   |               |                | ✓            |
| S121      | Wang                | <i>PLoS One</i>                                                                 | 2016                   |               |                | ✓            |
| S122      | Wang                | <i>PLoS One</i>                                                                 | 2016                   |               |                | ✓            |
| S123      | Wang                | <i>Tumor Biology</i>                                                            | 2017                   |               |                | ✓            |
| S124      | Wen ¥               | <i>Tumor Biology</i>                                                            | N/A                    | N/A           | N/A            | N/A          |
| S125      | Wu                  | <i>Journal of Diabetes</i>                                                      | 2016                   |               |                | ✓            |
| S126      | Wu                  | <i>Molecular Neurobiology</i>                                                   | 2015                   |               |                | ✓            |

| <b>No</b> | <b>First Author</b> | <b>Journal</b>                                                     | <b>Retraction year</b> | <b>Method</b> | <b>Writing</b> | <b>Ethic</b> |
|-----------|---------------------|--------------------------------------------------------------------|------------------------|---------------|----------------|--------------|
| S127      | Xiao                | <i>Tumor Biology</i>                                               | 2015                   |               |                | ✓            |
| S128      | Xing                | <i>Molecular Biology Reports</i>                                   | 2015                   |               |                | ✓            |
| S129      | Xing                | <i>Tumor Biology</i>                                               | 2015                   |               |                | ✓            |
| S130      | Xiong               | <i>Ejso</i>                                                        | 2015                   |               |                | ✓            |
| S131      | Xiong               | <i>Medicine</i>                                                    | 2014                   |               |                | ✓            |
| S132      | Xu                  | <i>European Journal of Medical Research</i>                        | 2015                   |               |                | ✓            |
| S133      | Xu                  | <i>Journal of orthopaedic surgery and research</i>                 | 2015                   |               |                | ✓            |
| S134      | Xu                  | <i>Journal of orthopaedic surgery and research</i>                 | 2015                   |               |                | ✓            |
| S135      | Xu                  | <i>Journal of Surgical Oncology</i>                                | 2015                   |               |                | ✓            |
| S136      | Xue ¥               | <i>Tumor Biology</i>                                               |                        | N/A           | N/A            | N/A          |
| S137      | Yan                 | <i>Molecular Biology Reports</i>                                   | 2015                   |               |                | ✓            |
| S138      | Yang                | <i>Journal of Bone and Mineral Metabolism</i>                      | 2019                   |               |                | ✓            |
| S139      | Yang                | <i>Journal of orthopaedic surgery and research</i>                 | 2015                   |               |                | ✓            |
| S140      | Yang                | <i>Medical Science Monitor</i>                                     | 2016                   |               |                | ✓            |
| S141      | Yang                | <i>Molecular Neurobiology</i>                                      | 2017                   |               |                | ✓            |
| S142      | Yang                | <i>Molecular Neurobiology</i>                                      | 2017                   |               |                | ✓            |
| S143      | Ye                  | <i>Eur Heart J</i>                                                 | 2019                   | ✓             |                |              |
| S144      | Yin                 | <i>Journal of Dermatology</i>                                      | 2013                   |               |                | ✓            |
| S145      | Yin                 | <i>Tumor Biology</i>                                               | 2017                   |               |                | ✓            |
| S146      | Yu                  | <i>Molecular Biology Reports</i>                                   | 2015                   |               |                | ✓            |
| S147      | Yu                  | <i>Molecular Biology Reports</i>                                   | 2015                   |               |                | ✓            |
| S148      | Yuan                | <i>Cancer Epidemiology Biomarkers &amp; Prevention</i>             | 2019                   | ✓             |                |              |
| S149      | Zarychanski         | <i>Open Med</i>                                                    | 2010                   | ✓             |                |              |
| S150      | Zhai                | <i>Tumor Biology</i>                                               | 2015                   |               |                | ✓            |
| S151      | Zhang               | <i>Int J Surg</i>                                                  | 2017                   |               |                | ✓            |
| S152      | Zhang               | <i>International Journal of Clinical and Experimental Medicine</i> | 2016                   |               |                | ✓            |
| S153      | Zhang               | <i>Tumor Biology</i>                                               | 2017                   |               |                | ✓            |
| S154      | Zhao                | <i>Journal of Orthopaedic Surgery and Research</i>                 | 2018                   | ✓             |                |              |
| S155      | Zhao                | <i>Molecular Biology Reports</i>                                   | 2015                   |               |                | ✓            |
| S156      | Zhao                | <i>Reproductive Biomedicine Online</i>                             | 2016                   |               |                | ✓            |

| <b>No</b> | <b>First Author</b> | <b>Journal</b>                                          | <b>Retraction year</b> | <b>Method</b> | <b>Writing</b> | <b>Ethic</b> |
|-----------|---------------------|---------------------------------------------------------|------------------------|---------------|----------------|--------------|
| S157      | Zheng               | <i>Journal of ECT</i>                                   | 2016                   | ✓             |                |              |
| S158      | Zheng               | <i>Journal of ECT</i>                                   | 2016                   | ✓             |                |              |
| S159      | Zhgan               | <i>Medicine</i>                                         | 2019                   |               |                | ✓            |
| S160      | Zhou                | <i>European Journal of Medical Research</i>             | 2016                   |               |                | ✓            |
| S161      | Zhou                | <i>Molecular Biology Reports</i>                        | 2015                   |               |                | ✓            |
| S162      | Zhu                 | <i>Medicine</i>                                         | 2018                   |               |                | ✓            |
| S163      | Zhu                 | <i>PLoS One</i>                                         | 2018                   | ✓             |                |              |
| S164      | Zuo                 | <i>Molecular Biology Reports</i>                        | 2015                   |               |                | ✓            |
| S165      | Liu                 | <i>Aging Clinical and Experimental Research</i>         | 2020                   |               |                | ✓            |
| S166      | Hariyanto           | <i>AIDS Research and Human Retroviruses</i>             | 2021                   |               |                | ✓            |
| S167      | Vlok                | <i>The American Journal of Emergency Medicine</i>       | 2020                   |               |                | ✓            |
| S168      | Wang                | <i>BioMed Research International</i>                    | 2021                   | ✓             |                | ✓            |
| S169      | Li                  | <i>BioMed Research International</i>                    | 2020                   | ✓             |                | ✓            |
| S170      | Sun                 | <i>BioMed Research International</i>                    | 2020                   | ✓             |                | ✓            |
| S171      | Yang                | <i>BioMed Research International</i>                    | 2021                   | ✓             |                | ✓            |
| S172      | Albay               | <i>BMC Neurology</i>                                    | 2020                   | ✓             |                |              |
| S173      | Zhong ‡             | <i>Clinical Drug Investigation</i>                      | 2021                   | N/A           | N/A            | N/A          |
| S174      | Ferlito             | <i>Clinical Rehabilitation</i>                          | 2021                   | ✓             | ✓              |              |
| S175      | Vorilhon            | <i>European Journal of Clinical Pharmacology</i>        | 2021                   | ✓             |                |              |
| S176      | Shih                | <i>Experimental and therapeutic medicine</i>            | 2021                   | ✓             |                |              |
| S177      | Li                  | <i>Gastroenterology Research and Practice</i>           | 2020                   | ✓             |                | ✓            |
| S178      | Tian                | <i>Italian Journal of Pediatrics</i>                    | 2021                   |               |                | ✓            |
| S179      | Zhou                | <i>Journal of Orthopaedic Surgery and Research</i>      | 2021                   |               |                | ✓            |
| S180      | Hodkinson           | <i>JAMA network open</i>                                | 2020                   | ✓             |                |              |
| S181      | Cai                 | <i>Journal of Cellular Biochemistry</i>                 | 2021                   | ✓             |                |              |
| S182      | López-Valverde      | <i>Journal of Clinical Medicine</i>                     | 2020                   | ✓             |                |              |
| S183      | Li                  | <i>Journal of Cosmetic Dermatology</i>                  | 2020                   |               |                | ✓            |
| S184      | Fan                 | <i>Journal of Hypertension</i>                          | 2021                   | ✓             |                |              |
| S185      | Zhang ‡             | <i>Journal of Stroke &amp; Cerebrovascular Diseases</i> | 2021                   | N/A           | N/A            | N/A          |
| S186      | Guo                 | <i>Journal of Zhejiang University-SCIENCE B</i>         | 2020                   | ✓             |                |              |

| <i>No</i> | <i>First Author</i> | <i>Journal</i>                                                | <i>Retraction year</i> | <i>Method</i> | <i>Writing</i> | <i>Ethic</i> |
|-----------|---------------------|---------------------------------------------------------------|------------------------|---------------|----------------|--------------|
| S187      | Liu                 | <i>Medicine</i>                                               | 2020                   | ✓             |                | ✓            |
| S188      | He                  | <i>Medicine</i>                                               | 2020                   | ✓             |                |              |
| S189      | Peng                | <i>Medicine</i>                                               | 2020                   | ✓             | ✓              |              |
| S190      | Zeng                | <i>Medicine</i>                                               | 2021                   | ✓             |                |              |
| S191      | Tan                 | <i>Medicine</i>                                               | 2021                   | ✓             |                |              |
| S192      | Huang               | <i>Medicine</i>                                               | 2021                   |               |                | ✓            |
| S193      | Huang               | <i>Medicine</i>                                               | 2021                   |               |                | ✓            |
| S194      | De Vecchis          | <i>MINERVA CARDIOANGIOLOGICA</i>                              | 2020                   |               |                | ✓            |
| S195      | Hussain             | <i>Obesity Research &amp; Clinical Practice</i>               | 2021                   | ✓             |                |              |
| S196      | Wang                | <i>PLoS One</i>                                               | 2021                   |               |                | ✓            |
| S197      | Song                | <i>PROCEEDINGS OF THE ROYAL SOCIETY B-BIOLOGICAL SCIENCES</i> | 2021                   | ✓             |                |              |
| S198      | Zhang               | <i>Scientific Reports</i>                                     | 2021                   | ✓             |                |              |

¥ No official announcement or clear reasoning for the retraction.

‡ The reason of retraction: Original research (randomized controlled trials) in their analyses were retracted after the meta-analysis had been published, and authors performed their meta-analysis without cognisance of the concerns with respect to data integrity in the original trials.
