# Supplementary material for: Increasing retractions of meta-analyses publications for methodological flaw
Source: Springer Nature journal article supplement (doi:10.1186/s13643-021-01822-2), 2021-10-08

**Additional file 5 | Doughnut plot of clarity of reasons for retractions of meta-analyses**

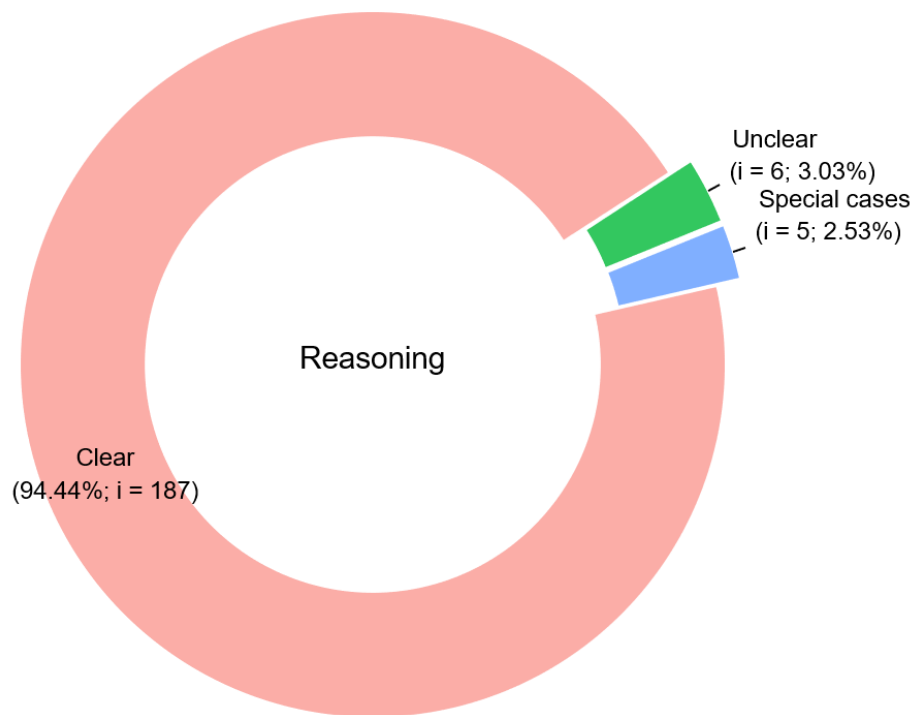

**Appendix 6 | Plot of Cochran Q test for three categories of retraction reason**

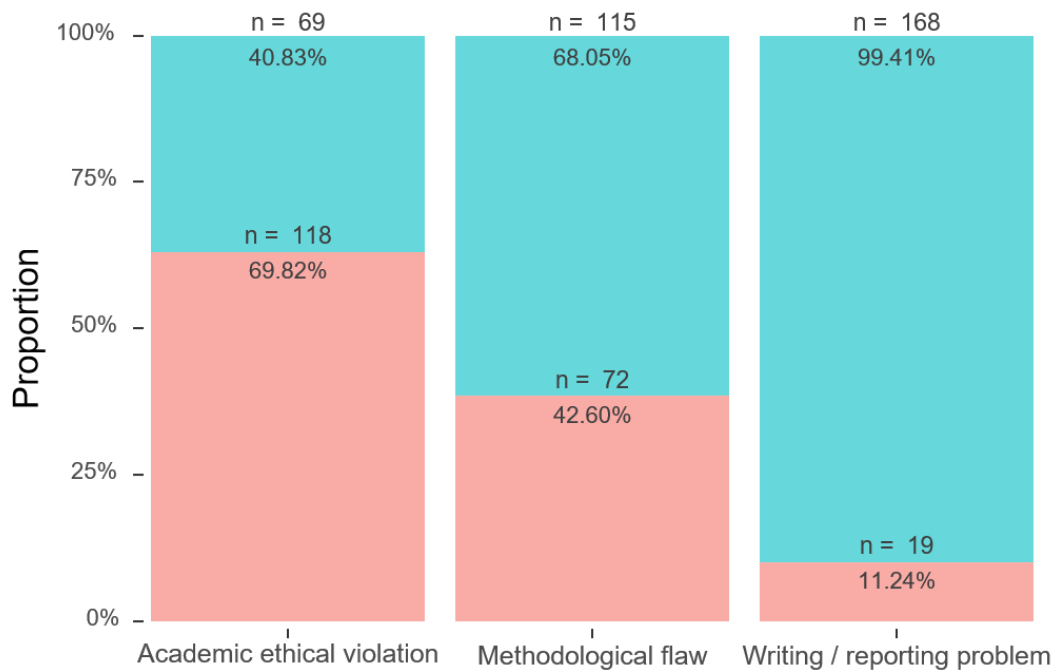

**Reasoning (count from 187 retraction notes)**

Method vs Writing:  $Z = 6.47$ ,  $P\text{-value} < 0.001$   
 Method vs Ethic:  $Z = -3.51$ ,  $P\text{-value} < 0.01$   
 Writing vs Ethic:  $Z = -8.53$ ,  $P\text{-value} < 0.001$

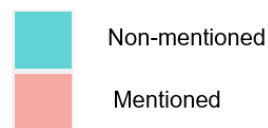

Supplement: MOESM5 [file 19741354]
