# Supplementary material for: Increasing retractions of meta-analyses publications for methodological flaw
Source: Springer Nature journal article supplement (doi:10.1186/s13643-021-01822-2), 2021-10-08

**Additional file 6 | Plot of Cochran Q test for three categories of retraction reason**

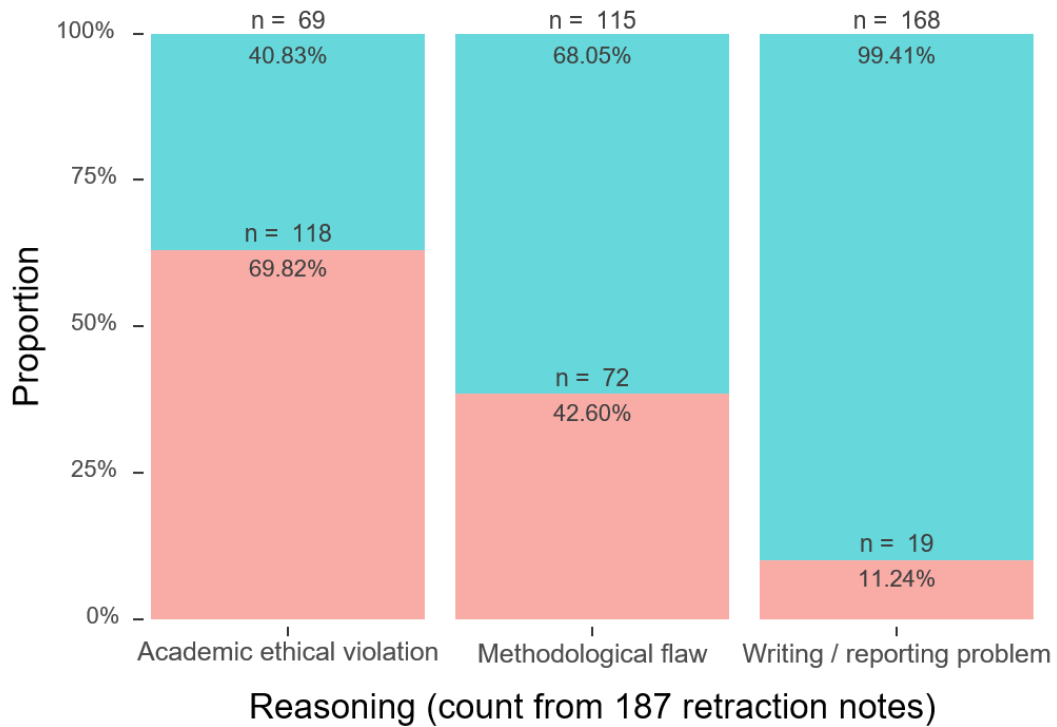

Method vs Writing:  $Z = 6.47$ ,  $P\text{-value} < 0.001$

Method vs Ethic:  $Z = -3.51$ ,  $P\text{-value} < 0.01$

Writing vs Ethic:  $Z = -8.53$ ,  $P\text{-value} < 0.001$

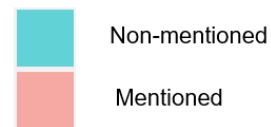

Supplement: MOESM6 [file 19741354]
